# Supplementary material for: Immunogenicity of Oxford-AstraZeneca COVID-19 Vaccine in Vietnamese Health-Care Workers
Source: PubMed Central journal article supplement (PMC8832887; doi:10.4269/ajtmh.21-0849), 2022-01-07
Supplement: tpmd210849.SD1.pdf [file tpmd210849.SD1.pdf]

1 **Immunogenicity of Oxford-AstraZeneca COVID-19 vaccine in**  
2 **Vietnamese healthcare workers**

3 Nguyen Van Vinh Chau<sup>1</sup>, Lam Anh Nguyet<sup>2</sup>, Nguyen Thanh Truong<sup>1</sup>, Le Mau Toan<sup>1</sup>,  
4 Nguyen Thanh Dung<sup>1</sup>, Le Manh Hung<sup>1</sup>, Mai Thanh Nhan<sup>1</sup>, Dinh Nguyen Huy Man<sup>1</sup>,  
5 Nghiem My Ngoc<sup>1</sup>, Huynh Phuong Thao<sup>1</sup>, Tran Nguyen Hoang Tu<sup>1</sup>, Huynh Kim Mai<sup>3</sup>, Do  
6 Thai Hung<sup>3</sup>, Nguyen Thi Han Ny<sup>2</sup>, Le Kim Thanh<sup>2</sup>, Nguyen To Anh<sup>2</sup>, Nguyen Thi Thu  
7 Hong<sup>2</sup>, Le Nguyen Truc Nhu<sup>2</sup>, Lam Minh Yen<sup>2</sup>, Marc Choisy<sup>2,4</sup>, Tran Tan Thanh<sup>2</sup>, Guy  
8 Thwaites<sup>2,3</sup> and Le Van Tan<sup>2</sup>, for OUCRU COVID-19 Research Group\*

9 <sup>1</sup>Hospital for Tropical Diseases, Ho Chi Minh City, Vietnam

10 <sup>2</sup>Oxford University Clinical Research Unit, Ho Chi Minh City, Vietnam

11 <sup>3</sup>Institute of Pasteur, Nha Trang City, Vietnam

12 <sup>4</sup>Centre for Tropical Medicine and Global Health, Nuffield Department of Medicine,  
13 University of Oxford, Oxford, UK

14 \*Members of the groups are listed in the acknowledgments.

15 Correspondence: Nguyen Van Vinh Chau, [chaunvv@oucru.org](mailto:chaunvv@oucru.org), Le Van Tan,  
16 [tanlv@oucru.org](mailto:tanlv@oucru.org)

17 **List of groups prioritized for COVID-19 vaccination in Vietnam**

- 18 1. Frontline healthcare workers of COVID-19, including people whose work is to deal  
19 with COVID-19 prevention and control work (members of COVID-19 steering  
20 committees at all levels, staff at state-run quarantine sites, people conducting  
21 contract tracing and epidemiological investigations, volunteers, reporters among  
22 others), military and public security forces
- 23 2. Vietnamese diplomats, customs and immigration officers
- 24 3. Essential service workers in sectors such as aviation, transport, tourism, electricity  
25 and water supply
- 26 4. Teachers and individuals working at education and training facilities, and those  
27 working at State agencies with regular contact with various people
- 28 5. People with chronic diseases or aging above 65
- 29 6. Residents in outbreak hotspots in Vietnam
- 30 7. Poor people, Policy beneficiaries
- 31 8. Those who will be sent abroad for learning and working
- 32 9. Other people determined by the Ministry of Health

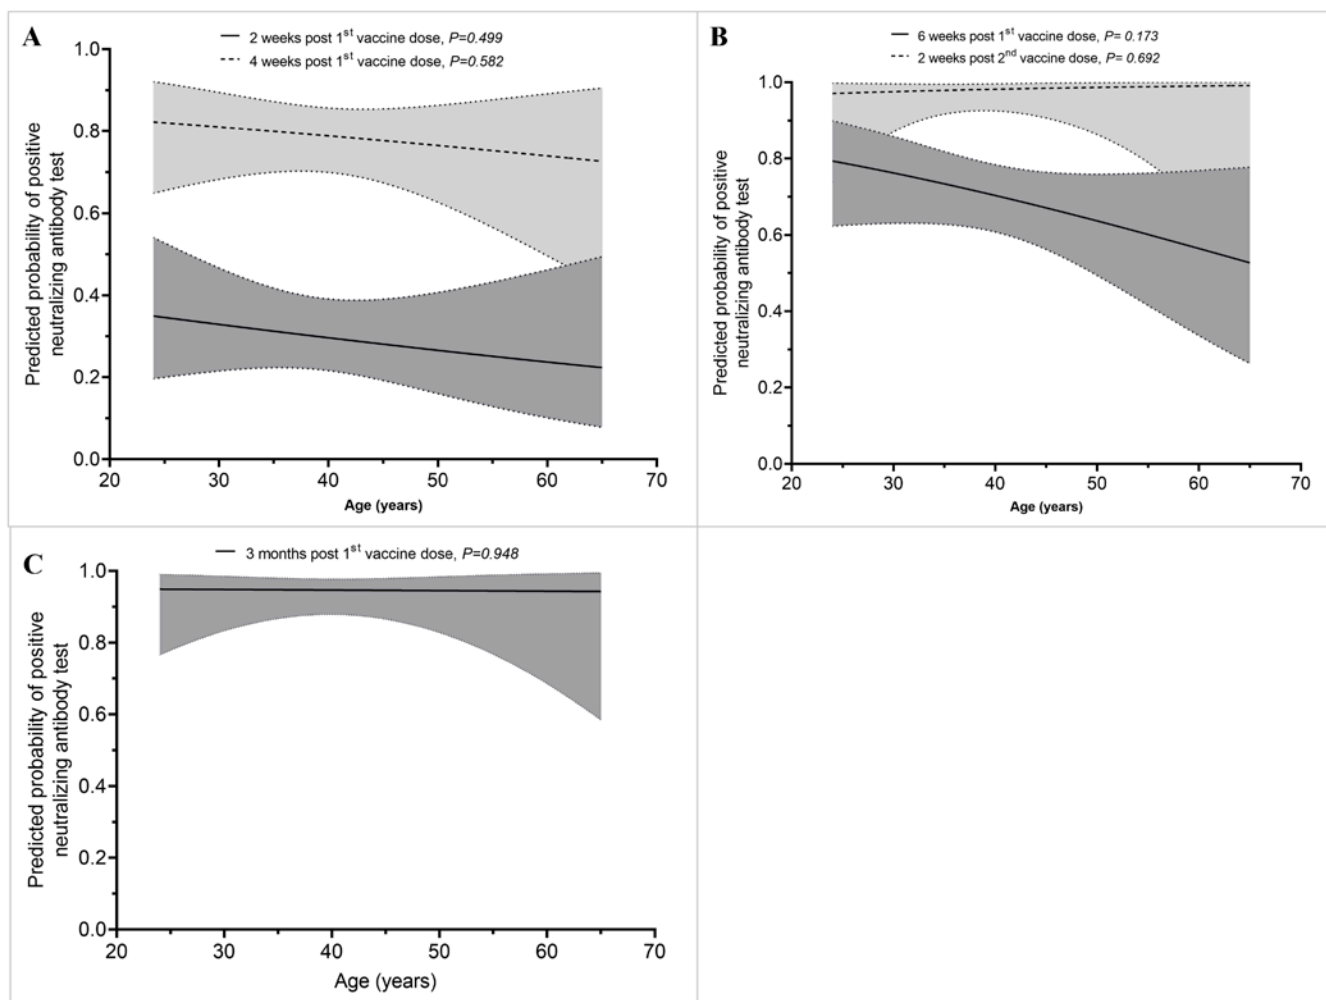

**Supplementary Figure 1:** Probability of having detectable neutralizing antibodies among the study participants selected for assessment of the impact of the second dose. **A)** At 2 and 4 weeks after the first dose (n=104), **B)** Before the second dose (i.e.6 weeks after the first dose) and 2 weeks after the second dose (n=104) and **C)** at month 3 after the first dose (n=94). Shaded areas indicate 95% of confident intervals.

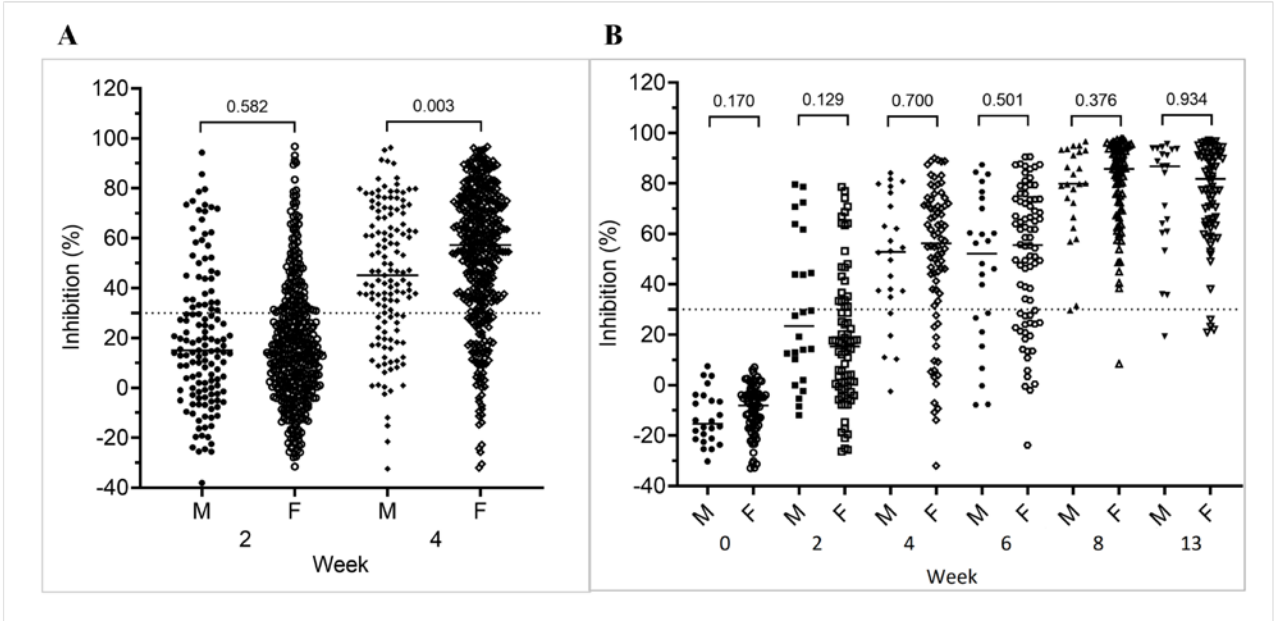

**Supplementary Figure 2:** Association between neutralizing antibody levels and gender. **A)** At 2 and 4 weeks after the first dose of the whole group (n=554), **B)** From baseline to month three after the first dose of the subgroup
